# Supplementary material for: Energy-requiring uptake of prostasomes and PC3 cell-derived exosomes into non-malignant and malignant cells
Source: PubMed Central journal article supplement — J Extracell Vesicles. 2016 Mar 7;5:10.3402/jev.v5.29877. doi: 10.3402/jev.v5.29877 (PMC4783432; doi:10.3402/jev.v5.29877), 2016-03-07
Supplement: JEV-5-29877-s001.pdf [file JEV-5-29877-s001.pdf]

**Supplementary table 1***14-3-3 proteins*

|                           |                           |
|---------------------------|---------------------------|
| 14-3-3 protein beta/alpha | 14-3-3 protein beta/alpha |
| 14-3-3 protein epsilon    | 14-3-3 protein epsilon    |
| 14-3-3 protein gamma      | 14-3-3 protein gamma      |
| 14-3-3 protein theta      | 14-3-3 protein theta      |
| 14-3-3 protein zeta/delta | 14-3-3 protein zeta/delta |

*Actins*

|                                                       |                                             |
|-------------------------------------------------------|---------------------------------------------|
| actin, cytoplasmic 2                                  | Actin, cytoplasmic 1*                       |
| actin-related protein                                 | Actin-related protein 2                     |
| actin-related protein 2/3 complex subunit 4 isoform a | Actin-related protein 2/3 complex subunit 4 |

*Annexins*

|                      |             |
|----------------------|-------------|
| annexin A1           | Annexin A1  |
| annexin A11          | Annexin A11 |
| annexin A2 isoform 2 | Annexin A2  |
| annexin A3           | Annexin A3  |
| annexin A7 isoform 1 | Annexin A7  |

*CD-Antigens*

|                                                    |                                |
|----------------------------------------------------|--------------------------------|
| CD63 antigen isoform A                             | CD63 antigen                   |
| CD81 antigen                                       | CD81 antigen                   |
| CD9 antigen                                        | CD9 antigen                    |
| dipeptidyl peptidase 4                             | Dipeptidyl peptidase 4 (CD26)  |
| leukocyte surface antigen CD47 isoform 1 precursor | Leukocyte surface antigen CD47 |
| basigin (Ok blood group), isoform CRA_d            | Basigin (CD147)                |

*GTP-binding proteins*

|                                                    |                                                                  |
|----------------------------------------------------|------------------------------------------------------------------|
| GTP-binding protein alpha q                        | GTP-binding nuclear protein Ran                                  |
|                                                    | GTP-binding protein Rheb                                         |
| guanine nucleotide-binding protein alpha-i subunit | Guanine nucleotide-binding protein G(i) subunit alpha-1          |
|                                                    | Guanine nucleotide-binding protein G(i) subunit alpha-2          |
|                                                    | Guanine nucleotide-binding protein G(I)/G(S)/G(T) subunit beta-1 |
|                                                    | Guanine nucleotide-binding protein                               |

|                                                                        |                                                                                                            |
|------------------------------------------------------------------------|------------------------------------------------------------------------------------------------------------|
|                                                                        | G(I)/G(S)/G(T) subunit beta-2                                                                              |
| guanine nucleotide-binding protein G(k) subunit alpha                  | Guanine nucleotide-binding protein G(k) subunit alpha                                                      |
| guanine nucleotide-binding regulatory protein 2                        | Guanine nucleotide-binding protein G(s) subunit alpha isoforms short*                                      |
| guanine nucleotide-binding regulatory protein alpha-inhibitory subunit | Guanine nucleotide-binding protein subunit alpha-11<br>Guanine nucleotide-binding protein subunit alpha-13 |
| <i>HSP-proteins</i>                                                    |                                                                                                            |
| heat shock 90kDa protein 1, alpha                                      |                                                                                                            |
| heat shock cognate 71 kDa protein isoform 1                            | Heat shock cognate 71 kDa protein                                                                          |
| heat shock protein beta-1                                              | Heat shock protein beta-1                                                                                  |
| heat shock protein gp96 precursor                                      |                                                                                                            |
| heat shock-induced protein                                             |                                                                                                            |
| HSP70-2                                                                | Heat shock 70 kDa protein 1A/1B                                                                            |
| HSP90AB1 protein                                                       | Heat shock protein HSP 90-alpha                                                                            |
| HSPA2 protein                                                          | Heat shock protein HSP 90-beta                                                                             |
| HSPC027                                                                | Heat shock protein 105 kDa                                                                                 |
| HSPC137                                                                |                                                                                                            |
| <i>Histone proteins</i>                                                |                                                                                                            |
| histone H2A                                                            |                                                                                                            |
| histone H2A type 1                                                     |                                                                                                            |
| histone H2A.2                                                          |                                                                                                            |
| histone H2B type 1-A                                                   | Histone H2B type 1-K*                                                                                      |
| histone H2B type 1-D                                                   | Histone H4                                                                                                 |
| <i>Keratins</i>                                                        |                                                                                                            |
| keratin                                                                |                                                                                                            |
| keratin 1                                                              | Keratin, type I cytoskeletal 9                                                                             |
| keratin 6B, isoform CRA_a                                              | Keratin, type II cytoskeletal 1                                                                            |
| keratin 9 (epidermolytic palmoplantar keratoderma)                     | Keratin, type II cytoskeletal 6A*                                                                          |
| <i>Myosins</i>                                                         |                                                                                                            |

|                                                                                            |                                            |
|--------------------------------------------------------------------------------------------|--------------------------------------------|
| myosin I beta                                                                              | Myosin-Ib                                  |
|                                                                                            | Myosin-Ic                                  |
| myosin 5c                                                                                  | Myosin-Id                                  |
| myosin-9                                                                                   | Myosin-9                                   |
| <i>Peroxiredoxins</i>                                                                      |                                            |
| peroxiredoxin-1                                                                            | Peroxiredoxin-1                            |
|                                                                                            | Peroxiredoxin-2                            |
|                                                                                            | Peroxiredoxin-5, mitochondrial             |
| peroxiredoxin-6                                                                            | Peroxiredoxin-6                            |
| <i>S100 proteins</i>                                                                       |                                            |
| protein S100-A11                                                                           | Protein S100-A10                           |
|                                                                                            | Protein S100-A13                           |
|                                                                                            | Protein S100-A14                           |
|                                                                                            | Protein S100-A16                           |
| <i>Ras proteins</i>                                                                        |                                            |
| ras GTPase-activating-like protein IQGAP1                                                  | Ras GTPase-activating-like protein IQGAP1  |
| ras homolog gene family, member C                                                          | Ras-related C3 botulinum toxin substrate 1 |
| ras-like protein                                                                           | Ras-related C3 botulinum toxin substrate 2 |
| Ras-related C3 botulinum toxin substrate 1<br>(rho family, small GTP binding protein Rac1) | Ras-related protein Rab-10                 |
| ras-related protein Rab-10                                                                 | Ras-related protein Rab-11A*               |
| ras-related protein Rab-13                                                                 | Ras-related protein Rab-12                 |
| ras-related protein Rab-14                                                                 | Ras-related protein Rab-13                 |
| ras-related protein Rab-18                                                                 | Ras-related protein Rab-14                 |
| ras-related protein Rab-1A isoform 1                                                       | Ras-related protein Rab-1A                 |
| ras-related protein Rab-1B                                                                 | Ras-related protein Rab-1B                 |
| ras-related protein Rab-27A                                                                | Ras-related protein Rab-22A                |
| ras-related protein Rab-27B                                                                | Ras-related protein Rab-27B                |
| ras-related protein Rab-2A                                                                 | Ras-related protein Rab-35                 |
| ras-related protein Rab-33B                                                                | Ras-related protein Rab-5A                 |
| ras-related protein Rab-35 isoform 1                                                       | Ras-related protein Rab-5B                 |

|                                                    |                                              |
|----------------------------------------------------|----------------------------------------------|
| ras-related protein Rab-39B                        | Ras-related protein Rab-7a                   |
| ras-related protein Rab-3A                         | Ras-related protein Rab-8A                   |
| ras-related protein Rab-3B                         | Ras-related protein Rab-8B                   |
| ras-related protein Rab-3C                         | Ras-related protein Ral-A                    |
| ras-related protein Rab-3D                         | Ras-related protein Ral-B                    |
| ras-related protein Rab-5B                         | Ras-related protein Rap-1A                   |
| ras-related protein Rab-6A isoform a               | Ras-related protein Rap-1b-like protein*     |
| ras-related protein Rab-8A                         | Ras-related protein Rap-2a                   |
| ras-related protein Ral-B precursor                | Ras-related protein Rap-2b                   |
| ras-related protein Rap-1b precursor               | Ras-related protein Rap-2c                   |
| ras-related protein R-Ras precursor                | Ras-related protein R-Ras                    |
| <i>Tubulins</i>                                    |                                              |
| tubulin alpha-1B chain                             | Tubulin alpha-1B chain*                      |
| tubulin alpha-8 chain isoform 1                    | Tubulin beta chain                           |
| tubulin beta                                       |                                              |
| tubulin beta-1 chain                               |                                              |
| tubulin beta-2A chain                              |                                              |
| tubulin beta-6 chain                               |                                              |
| Tubulin, beta 2C                                   |                                              |
| tubulin, beta 4, isoform CRA_b                     | Tubulin beta-4 chain*                        |
| <i>Ubiquitins</i>                                  |                                              |
| ubiquitin activating enzyme E1                     | Ubiquitin-conjugating enzyme E2 N*           |
| ubiquitin B, isoform CRA_d                         | Ubiquitin-conjugating enzyme E2 variant 1*   |
| ubiquitin carboxyl-terminal hydrolase 14 isoform a | Ubiquitin-like protein ISG15                 |
| ubiquitin isopeptidase T                           |                                              |
| ubiquitin-conjugating enzyme E2 N                  |                                              |
| polyubiquitin                                      | Polyubiquitin-B*                             |
| <i>Other common proteins</i>                       |                                              |
| 2',3'-cyclic-nucleotide 3'-phosphodiesterase       | 2',3'-cyclic-nucleotide 3'-phosphodiesterase |
| 5'-nucleotidase precursor                          | 5'-nucleotidase                              |

|                                                            |                                                                  |
|------------------------------------------------------------|------------------------------------------------------------------|
| ADP-ribosylation factor 4                                  | ADP-ribosylation factor 4                                        |
| ADP-ribosylation factor 6                                  | ADP-ribosylation factor 6                                        |
| brain acid soluble protein 1                               | Brain acid soluble protein 1                                     |
| calpain 1, (mu/I) large subunit, isoform CRA_c             | Calpain small subunit 1                                          |
| CDC42 GTPase-activating protein                            | Cell division control protein 42 homolog (cdc42)                 |
| clathrin heavy chain 1                                     | Clathrin heavy chain 1                                           |
| cofilin-1                                                  | Cofilin-1                                                        |
| cytoplasmic dynein 1 heavy chain 1                         | Cytoplasmic dynein 1 heavy chain 1                               |
| destrin isoform a                                          | Destrin                                                          |
| EGF-like repeats and discoidin I-like domains 3            | EGF-like repeat and discoidin I-like domain-containing protein 3 |
| elongation factor 1-alpha 2                                | Elongation factor 1-alpha 1*                                     |
| elongation factor 2                                        | Elongation factor 2                                              |
| ENO3, muscle enolase 3 beta                                | Alpha-enolase                                                    |
| ezrin                                                      | Ezrin                                                            |
| F-actin-capping protein subunit alpha-1                    | F-actin-capping protein subunit alpha-1                          |
| fatty acid synthase                                        | Fatty acid synthase                                              |
| filamin B, beta (actin binding protein 278), isoform CRA_c | Filamin-B                                                        |
| aldolase A                                                 | Fructose-bisphosphate aldolase A                                 |
| glucose-6-phosphate dehydrogenase                          | Glucose-6-phosphate 1-dehydrogenase                              |
| glyceraldehyde-3-phosphate dehydrogenase                   | Glyceraldehyde-3-phosphate dehydrogenase                         |
| GPRC5C                                                     | G-protein coupled receptor family C group 5 member C             |
| importin subunit beta-1                                    | Importin subunit beta-1                                          |
| L-lactate dehydrogenase A chain isoform 1                  | L-lactate dehydrogenase A chain                                  |
| L-lactate dehydrogenase B chain                            | L-lactate dehydrogenase B chain                                  |
| malate dehydrogenase, cytoplasmic                          | Malate dehydrogenase, cytoplasmic                                |
| moesin                                                     | Moesin                                                           |
| myoferlin                                                  | Myoferlin                                                        |
| peptidyl-prolyl cis-trans isomerase FKBP4                  | Peptidyl-prolyl cis-trans isomerase FKBP1A                       |
| phosphoglycerate kinase 1                                  | Phosphoglycerate kinase 1                                        |
| plastin 3 variant                                          | Plastin-3                                                        |
| profilin-1                                                 | Profilin-1                                                       |

|                                                                   |                                                                   |
|-------------------------------------------------------------------|-------------------------------------------------------------------|
| programmed cell death protein 6                                   | Programmed cell death protein 6                                   |
| protein DJ-1                                                      | Protein DJ-1                                                      |
| protein-tyrosine phosphatase                                      | Protein tyrosine phosphatase type IVA 2*                          |
| proto-oncogene tyrosine-protein kinase Src                        | Proto-oncogene tyrosine-protein kinase Src                        |
| pyruvate kinase                                                   | Pyruvate kinase isozymes M1/M2                                    |
| rab GDP dissociation inhibitor alpha                              | Rab GDP dissociation inhibitor beta                               |
| radixin                                                           | Radixin                                                           |
| rho-related GTP-binding protein RhoG precursor                    | Rho-related GTP-binding protein RhoG                              |
| solute carrier family 2, facilitated glucose transporter member 3 | Solute carrier family 2, facilitated glucose transporter member 1 |
| synaptic vesicle membrane protein VAT-1 homolog                   | Synaptic vesicle membrane protein VAT-1 homolog                   |
| transgelin-2                                                      | Transgelin-2                                                      |

*Supplemental Table 1.* Identification of 130 common prostasomal proteins assembled from human seminal plasma (14) and PC3 cells (9).
